# Supplementary material
Source: MDPI journal article supplement (https://www.mdpi.com/1999-4907/8/6/205)
Supplement: s1 [file s1]

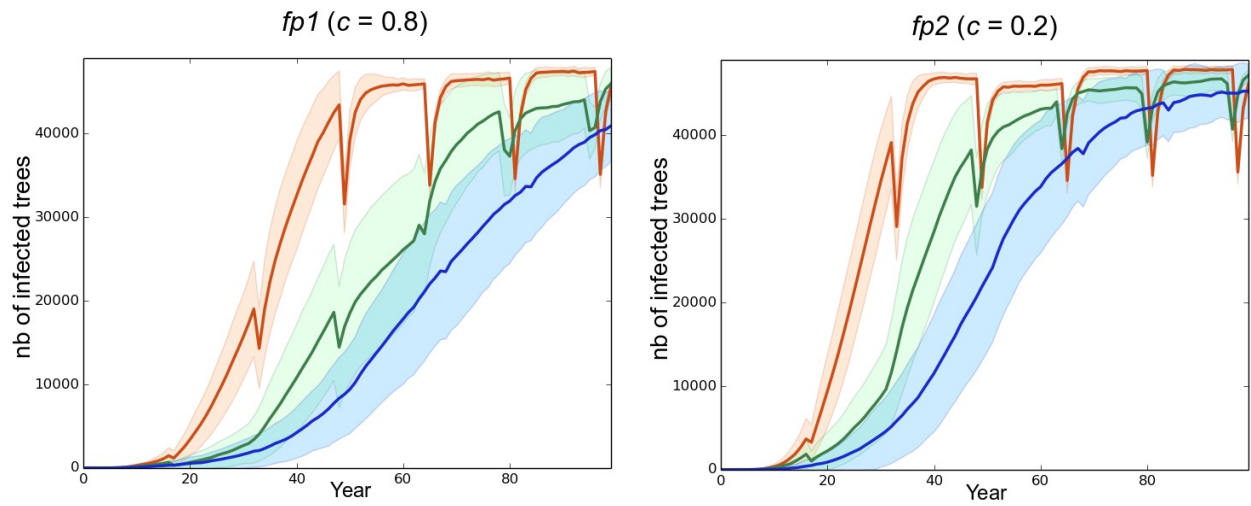

**Figure S1.** Total number of infected trees. The number of infected trees was monitored at the landscape scale. The initial genetic variance  $V_0$  was set to 4.06. Left-column: mostly clonal fungal profile *fp1* with a clonality rate  $c$  of 0.8. Right column: mostly sexual fungal profile *fp2* associated with a clonality rate  $c$  of 0.2. Red, green and blue represent a rotation length of 15, 30 and 50 years respectively. Each line is the mean of 50 independent replicates simulated. Each colored area corresponds to the standard deviation of the 50 replicates.
